# Supplementary material for: Local Interaction Density (LID), a Fast and Efficient Tool to Prioritize Docking Poses
Source: PubMed Central journal article supplement (PMC6681060; doi:10.3390/molecules24142610), 2019-07-18
Supplement: molecules-24-02610-s001.pdf [file molecules-24-02610-s001.pdf]

# Local Interaction Density (LID), a fast and efficient docking assistant tool

*Célien Jacquemard<sup>1</sup>, Viet-Khoa Tran-Nguyen<sup>1</sup>, Malgorzata N. Drwal<sup>1</sup>, Didier Rognan<sup>1</sup>, Esther Kellenberger<sup>1</sup>*

1 Laboratoire d'innovation thérapeutique, UMR7200, CNRS, Université de Strasbourg, 67400 Illkirch, France.

**Table 1.** The nineteen proteins in the LID dataset.

| <b>Uniprot ID</b> | <b>Name</b>                                                                    | <b>Uniprot AC</b> | <b>Protein class</b> |
|-------------------|--------------------------------------------------------------------------------|-------------------|----------------------|
| CDK2_HUMAN        | Cyclin-dependent kinase 2                                                      | P24941            | Transferase          |
| CAH2_HUMAN        | Carbonic anhydrase 2                                                           | P00918            | Lyase                |
| BACE1_HUMAN       | Beta-secretase 1                                                               | P56817            | Hydrolase            |
| HS90A_HUMAN       | Heat shock protein HSP 90-alpha                                                | P07900            | Chaperone            |
| PIM1_HUMAN        | Serine/threonine-protein kinase pim-1                                          | P11309            | Transferase          |
| TNKS2_HUMAN       | Poly [ADP-ribose] polymerase tankyrase-2                                       | Q9H2K2            | Transferase          |
| PK3CG_HUMAN       | Phosphatidylinositol 4,5-bisphosphate 3-kinase catalytic subunit gamma isoform | P48736            | Transferase          |
| PDE10_HUMAN       | cAMP and cAMP-inhibited cGMP 3',5'-cyclic phosphodiesterase 10A                | Q9Y233            | Hydrolase            |
| PNMT_HUMAN        | Phenylethanolamine N-methyltransferase                                         | P11086            | Transferase          |
| ESR1_HUMAN        | Estrogen receptor                                                              | P03372            | Activator            |
| CHK1_HUMAN        | Serine/threonine-protein kinase Chk1                                           | O14757            | Transferase          |
| HYES_HUMAN        | Bifunctional epoxide hydrolase 2                                               | P34913            | Hydrolase            |
| PDPK1_HUMAN       | 3-phosphoinositide-dependent protein kinase 1                                  | O15530            | Transferase          |
| BRD4_HUMAN        | Bromodomain-containing protein 4                                               | O60885            | Chromatin regulator  |
| ALDR_HUMAN        | Aldo-keto reductase family 1 member B1                                         | P15121            | Oxidoreductase       |
| GRIA2_RAT         | Glutamate receptor 2                                                           | P19491            | Ion channel          |
| LKHA4_HUMAN       | Leukotriene A-4 hydrolase                                                      | P09960            | Hydrolase            |
| MMP12_HUMAN       | Macrophage metalloelastase                                                     | P39900            | Hydrolase            |
| TGT_ZYMMO         | Queuine tRNA-ribosyltransferase                                                | P28720            | Transferase          |

**Table 2.** Proportion of interaction points generated from all structures describing the 19 proteins. (a) From a protein atom point of view. Hyd: hydrophobic contact; HBA: hydrogen-bond, acceptor on the protein; HBD: hydrogen-bond, donor on the protein.

| Uniprot ID  | Hyd   | $\pi$ -stacking | HBA <sup>(a)</sup> | HBD <sup>(a)</sup> | Ionic <sup>+</sup> <sup>(a)</sup> | Ionic <sup>-</sup> <sup>(a)</sup> | Metal | Number of points |
|-------------|-------|-----------------|--------------------|--------------------|-----------------------------------|-----------------------------------|-------|------------------|
| CDK2_HUMAN  | 72.54 | 0.62            | 13.50              | 12.28              | 0.51                              | 0.56                              | 0.00  | 7,291            |
| CAH2_HUMAN  | 64.26 | 2.77            | 8.10               | 14.98              | 0.00                              | 0.00                              | 9.88  | 4,038            |
| BACE1_HUMAN | 68.11 | 1.41            | 18.17              | 7.34               | 0.00                              | 4.96                              | 0.00  | 12,255           |
| HS90A_HUMAN | 82.38 | 3.22            | 8.60               | 5.40               | 0.26                              | 0.14                              | 0.00  | 5,720            |
| PIM1_HUMAN  | 82.11 | 1.40            | 5.64               | 6.88               | 0.98                              | 3.00                              | 0.00  | 1,934            |
| TNKS2_HUMAN | 65.86 | 10.07           | 8.70               | 15.37              | 0.00                              | 0.00                              | 0.00  | 3,207            |
| PK3CG_HUMAN | 82.12 | 0.00            | 5.60               | 12.27              | 0.00                              | 0.00                              | 0.00  | 1,695            |
| PDE10_HUMAN | 79.13 | 10.22           | 1.80               | 8.84               | 0.00                              | 0.00                              | 0.00  | 1,663            |
| PNMT_HUMAN  | 66.32 | 9.74            | 13.75              | 1.83               | 0.52                              | 7.85                              | 0.00  | 1,746            |
| ESR1_HUMAN  | 84.95 | 0.27            | 9.33               | 4.53               | 0.00                              | 0.93                              | 0.00  | 2,252            |
| CHK1_HUMAN  | 72.55 | 0.58            | 12.38              | 10.65              | 0.77                              | 3.07                              | 0.00  | 1,042            |
| HYES_HUMAN  | 77.05 | 6.81            | 7.65               | 7.56               | 0.00                              | 0.93                              | 0.00  | 1,072            |
| PDPK1_HUMAN | 70.18 | 0.00            | 11.65              | 16.28              | 0.00                              | 1.89                              | 0.00  | 1,425            |
| BRD4_HUMAN  | 85.02 | 0.56            | 4.40               | 10.02              | 0.00                              | 0.00                              | 0.00  | 1,068            |
| ALDR_HUMAN  | 76.77 | 5.93            | 0.14               | 17.16              | 0.00                              | 0.00                              | 0.00  | 2,075            |
| GRIA2_RAT   | 25.36 | 1.36            | 15.64              | 38.49              | 10.17                             | 8.97                              | 0.00  | 2,429            |
| LKHA4_HUMAN | 63.81 | 9.11            | 8.87               | 8.40               | 1.02                              | 4.79                              | 4.00  | 1,274            |
| MMP12_HUMAN | 60.98 | 8.40            | 7.29               | 14.67              | 0.00                              | 0.00                              | 8.65  | 1,179            |
| TGT_ZYMMO   | 41.63 | 7.91            | 32.68              | 16.63              | 0.00                              | 1.15                              | 0.00  | 872              |

**Table 3.** Performance of pose prediction for the 19 targets

| Uniprot ID  | Uniprot AC | Poses median RMSD (Å) |      |      |
|-------------|------------|-----------------------|------|------|
|             |            | ChemPLP               | GRIM | LID  |
| CDK2_HUMAN  | P24941     | 2.35                  | 1.56 | 1.87 |
| CAH2_HUMAN  | P00918     | 3.27                  | 2.17 | 1.91 |
| BACE1_HUMAN | P56817     | 1.76                  | 1.41 | 1.79 |
| HS90A_HUMAN | P07900     | 7.23                  | 2.12 | 2.70 |
| PIM1_HUMAN  | P11309     | 4.08                  | 3.12 | 3.21 |
| TNKS2_HUMAN | Q9H2K2     | 0.59                  | 0.55 | 0.55 |
| PK3CG_HUMAN | P48736     | 1.85                  | 1.48 | 1.76 |
| PDE10_HUMAN | Q9Y233     | 3.97                  | 1.35 | 2.74 |
| PNMT_HUMAN  | P11086     | 2.15                  | 1.23 | 1.98 |
| ESR1_HUMAN  | P03372     | 0.87                  | 1.64 | 1.72 |
| CHK1_HUMAN  | O14757     | 3.67                  | 1.62 | 3.24 |
| HYES_HUMAN  | P34913     | 7.51                  | 2.45 | 7.32 |
| PDPK1_HUMAN | O15530     | 2.37                  | 1.94 | 1.70 |
| BRD4_HUMAN  | O60885     | 4.77                  | 2.62 | 3.23 |
| ALDR_HUMAN  | P15121     | 0.94                  | 0.76 | 1.61 |
| GRIA2_RAT   | P19491     | 1.67                  | 0.86 | 1.70 |
| LKHA4_HUMAN | P09960     | 3.09                  | 1.51 | 3.83 |
| MMP12_HUMAN | P39900     | 2.16                  | 2.86 | 3.02 |
| TGT_ZYMMO   | P28720     | 0.66                  | 0.58 | 0.74 |

**Table 4.** AUC and logAUC of ChemPLP, LID and GRIM in virtual screening challenge with the DUD-E and PubChem (in bold) dataset.  $\lambda = 0.001$ .

| Uniprot ID  | Number of protein structures | AUC          |              |              | logAUC       |              |              |
|-------------|------------------------------|--------------|--------------|--------------|--------------|--------------|--------------|
|             |                              | Chem PLP     | GRIM         | LID          | ChemPLP      | GRIM         | LID          |
| ALDR_HUMAN  | 1                            | 70.25        | 75.76        | 72.21        | 35.10        | 43.07        | 44.74        |
| BACE1_HUMAN | 1                            | 80.39        | 77.93        | 85.07        | 43.39        | 39.82        | 49.43        |
| CAH2_HUMAN  | 1                            | 49.61        | 95.96        | 95.89        | 14.06        | 76.69        | 82.63        |
| CDK2_HUMAN  | 1                            | 68.70        | 77.34        | 80.26        | 24.96        | 31.60        | 43.70        |
| ESR1_HUMAN  | 1                            | 55.22        | 88.89        | 86.18        | 17.93        | 47.63        | 47.48        |
|             | <b>10</b>                    | <b>60.02</b> | <b>56.16</b> | <b>57.72</b> | <b>18.20</b> | <b>22.49</b> | <b>22.61</b> |
| GRIA2_RAT   | 1                            | 66.90        | 77.23        | 51.35        | 25.20        | 38.84        | 14.84        |
|             | 10                           | 70.25        | 75.35        | 72.45        | 29.71        | 38.11        | 33.14        |
| HS90A_HUMAN | 1                            | 50.07        | 70.65        | 61.48        | 14.70        | 29.58        | 22.63        |
|             | 10                           | 48.90        | 74.17        | 71.58        | 13.85        | 41.69        | 31.03        |
| LKHA4_HUMAN | 1                            | 94.39        | 92.48        | 93.49        | 59.29        | 62.98        | 67.54        |

LogAUC was computed with the following formula:

$$\text{LogAUC}_{\lambda} = \frac{1}{\log_{10} \frac{1}{\lambda}} \times \sum_i^{\text{where } x_i \geq \lambda} (\log_{10} x_{i+1} - \log_{10} x_i) \times \left( \frac{y_{i+1} - y_1}{2} \right)$$

**Table 5.** Enrichment factors and true positive percent at 5% decoys of ChemPLP, LID and GRIM in virtual screening challenge with the DUD-E and PubChem (in bold) dataset.

| Uniprot ID  | Number of protein structures | EF5%        |             |             | EFmax       | TP % at 5% decoys |             |             |
|-------------|------------------------------|-------------|-------------|-------------|-------------|-------------------|-------------|-------------|
|             |                              | ChemPLP     | GRIM        | LID         |             | Chem PLP          | GRIM        | LID         |
| ALDR_HUMAN  | 1                            | 8.06        | 9.20        | 9.71        | 56.5        | 37.1              | 41.5        | 44.0        |
| BACE1_HUMAN | 1                            | 10.1        | 6.69        | 10.5        | 63.9        | 45.2              | 31.4        | 49.4        |
| CAH2_HUMAN  | 1                            | 1.02        | 19.7        | 21.9        | 63.2        | 5.08              | 85.7        | 85.1        |
| CDK2_HUMAN  | 1                            | 3.38        | 4.27        | 9.53        | 58.7        | 16.6              | 21.3        | 45.5        |
| ESR1_HUMAN  | 1                            | 1.38        | 12.2        | 9.96        | 53.9        | 6.79              | 52.2        | 44.9        |
|             | <b>10</b>                    | <b>0.67</b> | <b>3.75</b> | <b>3.75</b> | <b>25.9</b> | <b>3.39</b>       | <b>16.9</b> | <b>18.6</b> |
| GRIA2_RAT   | 1                            | 3.81        | 9.88        | 1.27        | 74.8        | 18.3              | 46.8        | 6.33        |
|             | 10                           | 4.36        | 7.88        | 5.36        | 74.8        | 20.8              | 37.9        | 25.9        |
| HS90A_HUMAN | 1                            | 0.91        | 4.86        | 3.07        | 55.1        | 4.55              | 23.8        | 15.9        |
|             | 10                           | 0.225       | 10.1        | 4.87        | 55.1        | 1.13              | 43.1        | 25.0        |
| LKHA4_HUMAN | 1                            | 17.0        | 17.2        | 18.8        | 55.3        | 73.6              | 71.3        | 73.1        |

EF5% was computed with the following formula:

$$\text{EF5\%} = \frac{\text{Actives}_{5\%} / \text{Compounds}_{5\%}}{\text{Actives}_{\text{all}} / \text{Compounds}_{\text{all}}}$$

**Table 6.** Computation time of LID grid generation and scoring on the eight targets of the DUD-E dataset. Only active compounds are considered. The measures were done in triplicate. Std: standard deviation.

| Uniprot ID  | Number of poses | Number of interaction points in docked poses | Number of references | Number of interaction points in references | Grid generation time (s) |      | LID scoring time (s) |      |
|-------------|-----------------|----------------------------------------------|----------------------|--------------------------------------------|--------------------------|------|----------------------|------|
|             |                 |                                              |                      |                                            | Mean                     | Std  | Mean                 | Std  |
| ALDR_HUMAN  | 2200            | 82425                                        | 41                   | 4150                                       | 8.37                     | 0.24 | 7.28                 | 0.19 |
| BACE1_HUMAN | 4850            | 230795                                       | 227                  | 24510                                      | 49.9                     | 0.53 | 19.53                | 0.49 |
| CAH2_HUMAN  | 8342            | 277604                                       | 156                  | 8076                                       | 14.6                     | 0.53 | 20.90                | 0.69 |
| CDK2_HUMAN  | 7978            | 278549                                       | 195                  | 14582                                      | 33.77                    | 0.91 | 20.43                | 0.15 |
| ESR1_HUMAN  | 6270            | 466733                                       | 37                   | 4504                                       | 11.53                    | 0.42 | 30.47                | 0.80 |
| GRIA2_RAT   | 2970            | 87154                                        | 62                   | 5028                                       | 11.77                    | 0.21 | 5.97                 | 0.15 |
| HS90A_HUMAN | 1250            | 57673                                        | 139                  | 11440                                      | 25.27                    | 0.15 | 6.04                 | 0.29 |
| LKHA4_HUMAN | 2440            | 124538                                       | 26                   | 2548                                       | 6.21                     | 0.19 | 9.83                 | 0.64 |

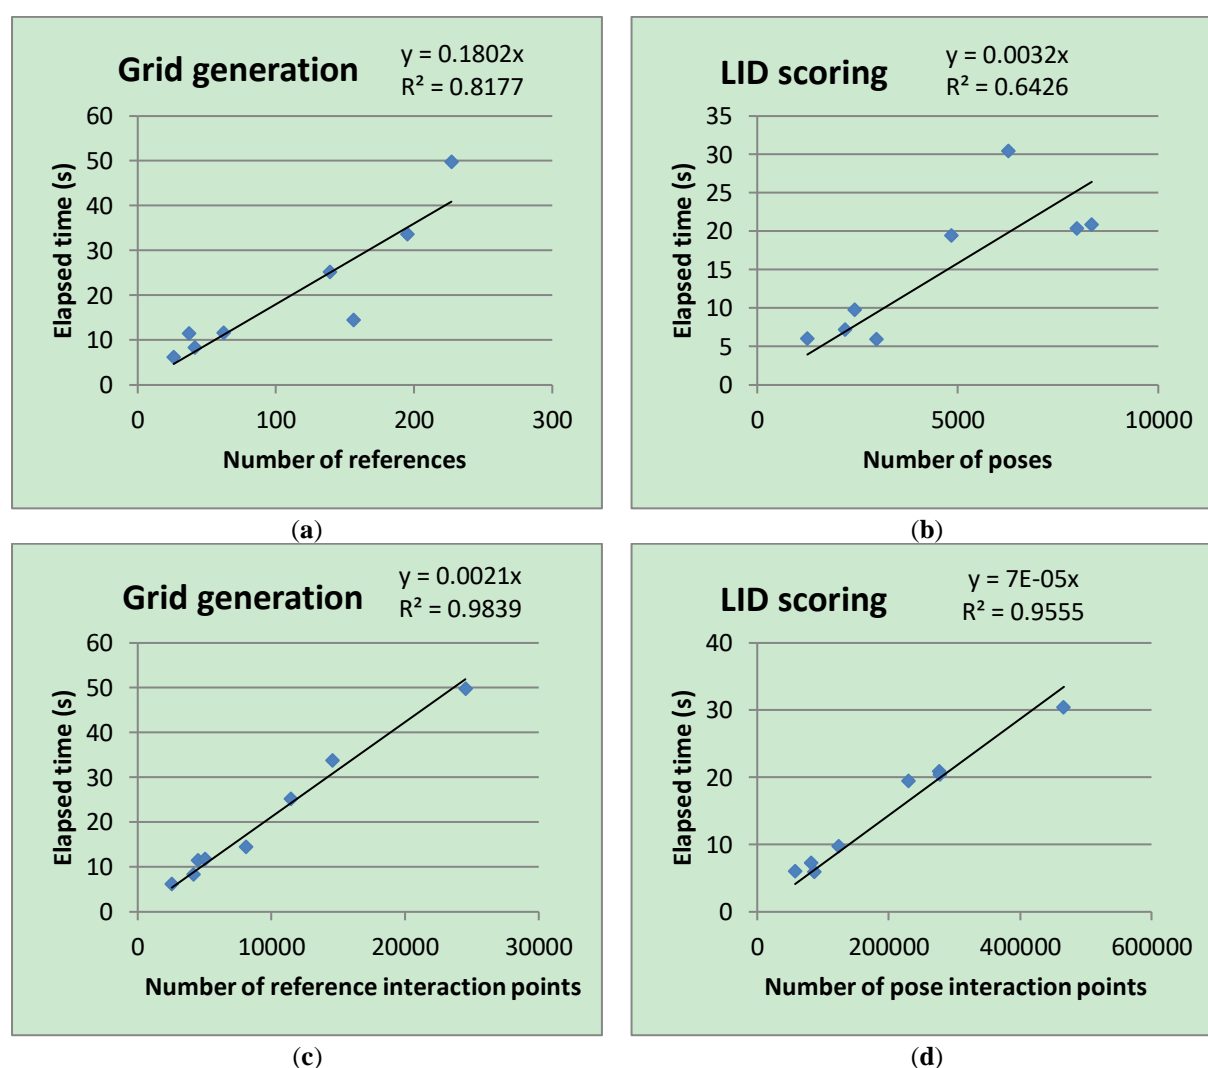

**Figure 1.** Correlation between the number of features and the computation time.

**Table 7.** Computation time of GRIM scoring on the eight targets of the DUD-E dataset. Only active compounds are considered. The measures were done in triplicate. Std: standard deviation.

| Uniprot ID  | Number of poses | Number of interaction points in poses | Number of reference | Number of interaction points in references | GRIM scoring time (s) |     |
|-------------|-----------------|---------------------------------------|---------------------|--------------------------------------------|-----------------------|-----|
|             |                 |                                       |                     |                                            | Mean                  | Std |
| ALDR_HUMAN  | 2200            | 82425                                 | 41                  | 4150                                       | 810                   | 30  |
| BACE1_HUMAN | 4850            | 230795                                | 227                 | 24510                                      | 11990                 | 887 |
| CAH2_HUMAN  | 8342            | 277604                                | 156                 | 8076                                       | 3931                  | 88  |
| CDK2_HUMAN  | 7978            | 278549                                | 195                 | 14582                                      | 7720                  | 272 |
| ESR1_HUMAN  | 6270            | 466733                                | 37                  | 4504                                       | 13430                 | 540 |
| GRIA2_RAT   | 2970            | 87154                                 | 62                  | 5028                                       | 470                   | 17  |
| HS90A_HUMAN | 1250            | 57673                                 | 139                 | 11440                                      | 1830                  | 79  |
| LKHA4_HUMAN | 2440            | 124538                                | 26                  | 2548                                       | 3410                  | 121 |
